1 **Title**

2 Long-distance migration was associated with increased prevalence of post-traumatic  
3 stress disorder in Syrian refugees

4 **Authors**

5 Andreas Halgreen Eiset<sup>1\*</sup>, ORCID: 0000-0002-5487-8359

6 Michaelangelo P. Aoun<sup>2</sup>

7 Monica Stougaard<sup>1</sup>

8 Annemarie Graa Gottlieb<sup>1</sup>

9 Ramzi S. Haddad<sup>2</sup>

10 Morten Frydenberg<sup>3</sup>

11 Wadih J. Naja<sup>2</sup>

12 <sup>1</sup>Department of Affective Disorders, Aarhus University Hospital–Psychiatry, Aarhus,  
13 Denmark

14 <sup>2</sup>Faculty of Medical Sciences, Lebanese University, Beirut, Lebanon

15 <sup>3</sup>Consultant biostatistician, Olsted, Denmark

16 \*Corresponding author

## 17 **Abstract**

18 **Background:** Refugees are forced migrants but there is a large variation in the distance  
19 that refugees cover and there is a knowledge gap on how this may affect refugees'  
20 health and health care needs. We investigated the association between long-distance  
21 migration and post-traumatic stress disorder (PTSD), a serious psychiatric disorder  
22 associated with deteriorating mental and somatic health. **Methods:** Included from 2016-  
23 2019 were 712 adult Syrian refugees and asylum seekers in Lebanon and Denmark  
24 arrived up to 12 months prior. PTSD was assessed using the Harvard Trauma  
25 Questionnaire and the estimate of association was obtained by multiply imputing  
26 missing data and adjusting for confounding by propensity score-weighting with  
27 covariates age, sex, socioeconomic status, trauma experience and WHO-5-score,  
28 reporting the bootstrap 95-percentile confidence interval (95% CI). Additionally, a  
29 number of sensitivity analyses were performed. **Results:** After multiply imputing  
30 missing data and propensity score-weighted adjustment for confounding, migration to  
31 Denmark instead of Lebanon was associated with an increase in PTSD prevalence of 9  
32 percentage point (95% CI [-1; 19] percentage point). **Discussion:** We found that long-  
33 distance migration was associated with an increase in the prevalence of PTSD  
34 suggesting that long-distance migration may be a factor to consider when assessing  
35 refugees' and asylum seekers' health. To secure timely and appropriate health care for  
36 this vulnerable group we need to remedy the current knowledge gap regarding the  
37 health effects of migration. This study is the first step in doing so.

## 38 **Introduction**

39 Refugees suffer from high risk of post-traumatic stress disorder (PTSD) [1] and are  
40 exposed to many risk-factors for PTSD before, during and after migration [2–4]. Risk  
41 factors for PTSD in the country of origin and in the host country has been examined in  
42 detail; however, the contribution of the migration itself has not received much attention  
43 in refugee health research. PTSD is a disorder that may develop after a traumatic event  
44 and is associated with significant loss of functioning and increased morbidity and  
45 mortality [5,6]. Symptoms of PTSD include intrusion (e.g. “flash-backs” and  
46 nightmares), avoidance and arousal, characterized by persistent perception of threat  
47 which may result in sleep deprivation, irritability and inability to concentrate [7,8]. Risk  
48 factors for developing PTSD comprise multiple trauma, female sex, being spouseless,  
49 ethnicity, lower educational status, comorbid mental disorders and type of trauma (for  
50 example intentional trauma, sexual assault etc.) [7]. Additionally, gene-environment  
51 interactions may play a key role [9]. Dysfunction of the amygdala (emotional learning  
52 and memory modulation) and medial prefrontal cortex (executive function) are key  
53 elements in PTSD and the disease is associated with epigenetic changes, increased  
54 blood levels of norepinephrine and decreased blood levels of glucocorticoids [7]. The  
55 life-time prevalence of PTSD in the general population is estimated to be around 5% for  
56 males and 10% for females with considerable variation according to the study  
57 population and diagnostic tools utilized [7,10]. In comparison, a recent meta-analysis  
58 produced a summary prevalence estimate for PTSD of 31% across all refugees [1] with  
59 little difference between males (29%) and females (34%) though with considerable  
60 variation between the country of origin, host countries and diagnostic tools; however,

61 not taking migration history into account. The impact of migration and the role and  
62 measurement of “distance” (geographical, cultural, linguistic etc.) has been discussed at  
63 length for a number of outcomes [11,12] and long-distance migration has been  
64 associated with poorer self-rated health in the general population [13], hypothesizing a  
65 link with increasing difficulty in acculturation [14,15]. In the present study, we aimed at  
66 taking an initial step in assessing the effect of migration on refugees’ and asylum  
67 seekers’ health by comparing the prevalence of PTSD in newly arrived Syrian refugees  
68 and asylum seekers in Lebanon and Denmark.

## 69 **Methods**

70 In a cross-sectional design with one-stage cluster randomized sampling between 2016  
71 and 2019, newly arrived adult Syrian refugees were included in Lebanon and newly  
72 arrived Syrian asylum seekers were included in Denmark and assessed for PTSD using  
73 the Harvard Trauma Questionnaire (HTQ)-scale with cut-off score at 2.5. The  
74 implemented inclusion criteria were: (a) adult ( $\geq 18$  years of age), (b) Syrian-born, (c)  
75 had left Syria after the onset of the ongoing civil-war (after February 2011), (d) arrived  
76 in Lebanon or Denmark less than 12 months prior to inclusion and (e) resident in the  
77 Lebanese settlements or Danish asylum seeker centres at the time of inclusion.  
78 Exclusion criteria were physical or mental illness that prevented participation. Variables  
79 to be collected to address confounding were decided upon *a priori* after discussions  
80 among the authors guided by graphical representations of our assumptions. See the  
81 Supplement for a detailed description of the data collection instruments and the directed  
82 acyclic graph illustrating our assumptions about the relation of the variables. Also the  
83 study protocol is published and freely available [16].

84 Lebanon is a country of about 6 million people living in an area of nearly 10.000 km<sup>2</sup>—  
85 comparable in size to the two major Danish island (Zealand and Funen). Since 2015  
86 Lebanon has stopped accepting asylum applications from Syrians seeking refuge in  
87 Lebanon. Nevertheless, being a close neighbour, in both geographical, linguistic and  
88 cultural distance, the influx of refugees from the Syrian war has endured. The majority  
89 live in structures ranging from regular (though dilapidated) structures to improvised  
90 tents clustered in informal gatherings scattered across Lebanon [17]. We stratified  
91 Lebanon into five regions based on geography, infrastructure and insights about local  
92 concerns (political, religious etc.). In each region, we collaborated with the local health  
93 service operators to draw up the sampling frame of gatherings and randomly decided on  
94 the inclusion sites, where all individuals eligible for inclusion were invited to participate  
95 (i.e. stratified cluster sampling [18,19]). See the Supplement for details on the sampling  
96 frame. We obtained permission to include participants in all regions of Lebanon, that is,  
97 we had access to include participants from areas that are usually outside the reach of  
98 researchers due to “security considerations”. Should a chosen site be deemed unsafe at  
99 the scheduled time of inclusion we relocated to the closest setting deemed appropriate  
100 within the same region.

101 Denmark is a country of about 6 million people living in an area of about 50.000 km<sup>2</sup>. In  
102 Denmark, all eligible residents at a random sample of asylum centres were invited. The  
103 Danish asylum seeker centres are run by the Danish Immigration Services but  
104 outsourced to different operators. Several types of asylum seeker centres exist with the  
105 most common being the accommodation centre, to which the asylum seeker is allocated  
106 by random shortly after arrival and applying for asylum in Denmark. Of five available

107 operators, three responded to the invitation, all accepting to participate in the study,  
108 representing a total of 11 accommodation asylum centres. Data-collection teams of two  
109 to four healthcare professionals were instructed during several pre-collection sessions in  
110 the practicalities and ethical considerations involved in the task: this encompassed  
111 obtaining written and informed consent, appropriate handling of confidential  
112 information, collection of the questionnaire data, the mental health self-rating scales,  
113 clinical measurements and the biological samples. At consent, the participant was  
114 instructed to independently complete a background questionnaire and mental health  
115 scales. The data collectors assisted those who could not read or write or had further  
116 questions regarding the study. Afterwards, the participant was invited to a semi-  
117 structured clinical interview and a short clinical exam of basic parameters (blood  
118 pressure, height, weight). Participants could at any time opt out of the data collection; if  
119 choosing to do so the participant was asked if she would care to provide a reason. Also,  
120 individuals who were invited but refused to participate were asked for a short non-  
121 structured interview including basic demographics and reason for refusal. The  
122 procedure was piloted in its entirety in Denmark including 10 participants in an asylum  
123 seeker centre, resulting in minor adjustments to the workflow. All relevant permissions  
124 were obtained prior to inclusion of any participant in both Lebanon and Denmark.

125 In the following we give a brief summary of the applied statistical methodology. Further  
126 details are given in the Supplement and a thorough discussion of the statistical  
127 methodological considerations necessary to combine multiple imputation and propensity  
128 score-weighted analysis is provided in Eiset and Frydenberg [20]. Missing data was  
129 multiply imputed and confounding was address by propensity score-weighting including

130 age, sex, socioeconomic status, experienced trauma and WHO-5-score in the model.  
131 The “standardised mortality ratio”-weights [21] was computed to estimate the weighted  
132 prevalence difference of PTSD in the population that fled to Denmark instead of  
133 Lebanon and presented with a 95-percentile confidence interval found by bootstrapping.  
134 A number of sensitivity analyses were carried out to assess the robustness of the  
135 estimated association between long-distance migration and PTSD. All data  
136 management, analysis and plots were done in R [22]. Further details are given in the  
137 Supplement as well as directly in the R code available together with the *a priori*  
138 described analysis plan and a number of the exploratory plots from  
139 <https://github.com/eiset/ARCH>.

## 140 **Results**

141 A total of 599 individuals were included in Lebanon and 113 were included in Denmark.  
142 Table 1 gives a statistical summary of the inclusion process and non-participation. The  
143 study populations differed on key variables such as sex (female: 73% in Lebanon, 47%  
144 in Denmark) and experience of violence (24% in Lebanon, 39% in Denmark) and there  
145 were missing values for all variables except long-distance migration. Figure 1 illustrates  
146 the missing proportion of key variables stratified on exposure status and Table 2 gives a  
147 detailed summary of the study population characteristics for both the observed  
148 realization and the imputed data set including missing for each covariates in the  
149 observed data.

150 The unadjusted prevalence of PTSD was higher in Denmark (60.2%) compared with  
151 Lebanon (55.1%). The prevalence difference of PTSD increased from 5.1 percentage

152 point (95-percentile CI [-4.6; 15.0]) to 8.8 percentage point (95-percentile CI [-1.4; 18.6  
153 percentage point]) after multiply imputing missing data and adjusting for confounding  
154 by propensity score-weighting. All sensitivity analyses produced estimates in the same  
155 direction and of the same magnitude, except when forcing all missing in the “Violence”  
156 variable to “Yes” in the study population included in Denmark, thus, grossly violating  
157 the missing-at-random assumption of multiple imputation. Table 3 presents the point  
158 estimate for the propensity score-weighted analysis and each of the sensitivity analysis  
159 accompanied by Figure 2 which includes different types of bootstrap confidence  
160 intervals.

## 161 **Discussion**

162 This study aimed at estimating the association between long-distance migration and  
163 prevalence of PTSD. The estimate of association corresponded to 87 additional cases of  
164 PTSD for every 1000 Syrian refugees that migrated to Denmark instead of Lebanon.  
165 The 95% confidence interval indicate that, under the model, the estimate may be as high  
166 as 190 additional cases or as low as 4 cases less per 1000 refugees, thus, the estimate  
167 did not reach statistical significance, which may be ascribed to the relatively low  
168 number of participants. The targeted sample size was not reached neither in Lebanon  
169 nor in Denmark due to structural and political obstacles during the data collection.

170 To the best of the authors’ knowledge this is the first investigation of the association of  
171 long-distance migration and PTSD in a refugee population. A recent study [23] of  
172 Syrian refugees in Lebanon and Norway found a prevalence of PTSD (assessed as  
173 HTQ-score  $\geq 2.5$ ) of 4% in Lebanon and 7% in Norway. The study conflated



174 heterogeneous groups for example asylum-seekers and refugees and participants with  
175 short and long stay in the host country prior to inclusion in the study. The study found  
176 that “Host country, Norway” was associated with an average increase in HTQ-score of  
177 3% (95% CI [-5%; 12%]) when adjusting for age and sex; however, did not provide  
178 estimates of how this translated into absolute number of participants with PTSD. With a  
179 mean HTQ-score of 1.49 in the study population in Lebanon the number of additional  
180 cases in Norway due to “host country” would be marginal. The underlying cause for the  
181 observed increase in PTSD prevalence in Syrian refugees and asylum seekers after long-  
182 distance migration has never been investigated. In our study, we approach this by  
183 minimized the effect of *living* in the host country, thus, “long-distance migration”  
184 represented the migration process itself (travelling through Europe). We found a high  
185 prevalence of PTSD and an increased prevalence difference compared with the  
186 aforementioned study. Some studies hypothesise that great distance between populations  
187 is associated with difficulty acculturating which in turn is associated with worse health  
188 outcomes, including mental health [13,15,24]. The presented study is a first step in  
189 examining this in a refugee population.

190 The prevalence estimates of PTSD was high in both Lebanon and Denmark compared  
191 with previous studies of Syrian refugees and across different study designs and utilized  
192 instruments for assessing PTSD [1,25–27]. In the present study, we utilized the widely  
193 used HTQ-score [28] which is considered valid across multiple settings and diagnostic  
194 classification systems [29] although the specific cut-off has been debated [30]. The  
195 sensitivity analysis showed little change in the estimate of association including when  
196 changing the HTQ-score cut-off. An effort was made to make the data collection in

197 Lebanon and Denmark as comparable as possible; however, differences may exist  
198 introducing information bias. For example, differential misclassification cannot be ruled  
199 out, if, during data collection in Denmark, doubt remained among the participants  
200 whether specific answers would affect their asylum application. This may explain (some  
201 of) the difference in prevalence of PTSD in Lebanon and Denmark; however, judged  
202 from extensive exploratory plotting of the covariates, there was no difference between  
203 the exposure groups in the association of the reported HTQ-score and WHO-5 (general  
204 mental well-being) or depression- or anxiety-scores, thus, the participants would have  
205 had to be very consistent in their misclassification of own mental health. The proportion  
206 that refused to answer, or did not know what to answer, in the question on  
207 socioeconomic status was high and differed between the study population in Denmark  
208 (22%) and in Lebanon (7%). After discussing this variable with Syrian natives, we  
209 speculate that “socioeconomic status” was not defined in sufficient detail for all  
210 participants to be able to reflect on the question; however, we do not have an  
211 explanation for the difference in proportion of missing between Lebanon and Denmark.  
212 We consider the risk of selection bias low given the randomized sampling design and  
213 very high participation rates. It was, however, not possible to retrieve or create a precise  
214 sampling frame in Lebanon and thus, it was based on best information available at the  
215 time, knowing that refugees frequently relocate and there is little registration of  
216 individuals outside the formalized refugee camps.

217 In the present study, the interpretation of the association between long-distance  
218 migration and PTSD is of course limited by the cross-sectional study design. Most  
219 importantly, the time-order may be reversed so that instead of long-distance migration

220 leading to higher risk of PTSD it may be that PTSD affect the “risk” of undertaking  
221 long-distance migration. A positive association between long-distance migration and  
222 PTSD was found, thus, a reversal of the time order would mean that individuals with  
223 PTSD are more likely to undertake long-distance migration. Although this cannot be  
224 entirely rejected, taking into account the classical symptoms of PTSD such as  
225 difficulties in concentrating and planning, this interpretation of the result seems far less  
226 likely than our stated hypothesis: that undertaking an, at times, hazardous travel and  
227 living with uncertainty about the near future, increases the risk of PTSD.

228 We addressed confounding by propensity score-weighting and obtained balance on all  
229 covariates judged from our pre-specified criteria. To account for confounding we  
230 included covariates in the propensity score model according to what the authors believe  
231 is the current best evidence [7]; however, this does not alleviate us of speculations of  
232 entirely other covariates that may change the estimate. Furthermore, the collapsing of  
233 two levels of the socioeconomic status covariate diminishes the information this  
234 variable contains and thus may be a source for residual confounding in both the multiple  
235 imputation and in the propensity score weighted analysis. The missing mechanism was  
236 “everywhere missing-at-random” allowing for frequentist inference from the multiply  
237 imputed data. In the Supplement, we provide examples of the discussion necessary for  
238 each partly observed variable to deem the missingness mechanism “everywhere  
239 missing-at-random”.

240 Whether the results presented in this paper is specific to Syrian refugees and host  
241 countries Lebanon and Denmark must be examined in future studies. We note that the  
242 direction of the association was consistent across different thresholds for PTSD

243 (effectively lowering and raising the estimated prevalence for PTSD in the study  
244 population), different propensity score models and when imposing violation of  
245 underlying assumptions of multiple imputation; the strength was also relatively  
246 consistent although, forcing all missing values in “experienced violence” in the exposed  
247 study population produced a relatively low prevalence difference estimate. We  
248 hypothesize that the association will be reproducible at least in comparable populations  
249 and settings—for example newly arrived adult refugees from a Middle Eastern country  
250 to a Western European country. Also, the association between long-distance migration  
251 and other health outcomes, for example other mental health issues, is of great interest.  
252 The presented study is an initial analysis of the association between long-distance  
253 migration and refugee health and provides the foundation upon which future studies  
254 could build.

255 **Tables**

256 **Table 1: Summary of the inclusion in Denmark and Lebanon**

|                               | <b>Denmark</b><br>n(%)          | <b>Lebanon</b><br>n(%)        |
|-------------------------------|---------------------------------|-------------------------------|
| Source population             | 613 <sup>a</sup>                | 1,011,366 <sup>a</sup>        |
| Examined for eligibility      | 124                             | 641                           |
| Excluded                      | 3                               | 11                            |
| Invited                       | 121 (100%)                      | 630 (100%)                    |
| Refused to participate        |                                 |                               |
| Total                         | 8 (7%)                          | 31 (5%)                       |
| Sex, female                   | 2                               | 5 <sup>b</sup>                |
| Age <sup>c</sup>              | All between 20 and 30 years old | All younger than 50 years old |
| Reasons <sup>d</sup>          |                                 |                               |
| Mistrust                      | 5                               | 1                             |
| No time                       | 2                               | 4                             |
| No personal gain              | 0                               | 2                             |
| No answer                     | 1                               | 24                            |
| Included (participation rate) | 113 (93%)                       | 599 (95%)                     |

257 <sup>a</sup>The number given for the source population represents a maximum and include for  
 258 example children. It was not possible to obtain a more precise estimate of the study  
 259 population. <sup>b</sup>Sex was only recorded for 8 non-participants in Lebanon. <sup>c</sup>Few non-  
 260 participants provided age (two in Denmark and two in Lebanon), thus a best guess is  
 261 provided. <sup>d</sup>Reasons provided from the non-participants, aggregated into smallest  
 262 possible number of strata.

263 **Table 2: Comparison of summary statistics of key variables in observed (with**  
 264 **missing) and imputed data set stratified on exposure group**

|                                          | Observed data      |                    | Imputed data       |                    |
|------------------------------------------|--------------------|--------------------|--------------------|--------------------|
|                                          | Lebanon<br>(n=599) | Denmark<br>(n=113) | Lebanon<br>(n=599) | Denmark<br>(n=113) |
| Age - years old                          | 35 (20)            | 30 (12.5)          | 35 (20)            | 30 (12.9)          |
| Missing                                  | n=58 (9.7%)        | n=10 (8.9%)        | NA                 | NA                 |
| Sex                                      |                    |                    |                    |                    |
| Female                                   | 72.7%              | 46.9%              | 72.7%              | 46.9%              |
| Missing                                  | n=38 (6.3%)        | n=0                | NA                 | NA                 |
| WHO-5-score                              | 24 (32)            | 24 (48)            | 24 (32)            | 24 (48)            |
| Missing                                  | n=47 (7.9%)        | n=4 (3.5%)         | NA                 | NA                 |
| Experienced violence                     |                    |                    |                    |                    |
| Yes                                      | 23.8%              | 39.5%              | 23.8%              | 39.7%              |
| Missing                                  | n=37 (6.2%)        | n=37 (32.7%)       | NA                 | NA                 |
| Socioeconomic status                     |                    |                    |                    |                    |
| Below average                            | 25.5%              | 24.7%              | 25.3%              | 23.2%              |
| On average                               | 63.4%              | 50.7%              | 63.4%              | 50.0%              |
| Above average <sup>a</sup>               | 4.5%               | 2.7%               | 11.3% <sup>a</sup> | 26.8% <sup>a</sup> |
| Don't know/refuse to answer <sup>a</sup> | 6.7%               | 21.9%              |                    |                    |
| Missing                                  | n=61 (10.2%)       | n=40 (35.4%)       |                    |                    |
| HTQ score                                | 2.56 (0.94)        | 2.62 (1)           | 2.56 (0.95)        | 2.62 (1)           |
| Missing                                  | n=33 (5.5%)        | n=0                | NA                 | NA                 |
| PTSD (HTQ score $\geq$ 2.5)              |                    |                    |                    |                    |
| Overall                                  | 55.1%              | 60.2%              | 54.9%              | 60.2%              |
| Female                                   | 59.4%              | 66.0%              | 59.1%              | 66.0%              |
| Male                                     | 44.7%              | 55.0%              | 43.7%              | 55.0%              |
| Missing                                  | n=33 (5.5%)        | n=0                | NA                 | NA                 |

265 Categorical variables are represented as % of observations. Continuous variables are  
266 represented as median (interquartile range). Missing is given as n (%) of all included  
267 participants for the observed data set. <sup>a</sup>In the substantive model, and thus in the multiple

268 imputation, the strata “Above average” and “Don’t know/refuse to answer” was  
 269 collapsed due to numerical problems in the multiple imputation.

270 **Table 3: Estimated prevalence difference in crude, propensity score analysis and**  
 271 **sensitivity analysis**

|                                                                         | <b>Prevalence difference;<br/>point estimate [95% CI]<sup>a</sup></b> |
|-------------------------------------------------------------------------|-----------------------------------------------------------------------|
| Multiply imputed and PS-weighted analysis                               | 8.8 [-1.4; 18.6] <sup>b</sup>                                         |
| Complete case analyses                                                  |                                                                       |
| Crude                                                                   | 5.1 [-4.6; 15.0] <sup>b</sup>                                         |
| PS-weighted                                                             | 5.1 [-5.0; 16.1] <sup>b</sup>                                         |
| Sensitivity analysis <sup>c</sup>                                       |                                                                       |
| Alternative PS model                                                    | 8.0 [-1.4; 17.8]                                                      |
| HTQ score threshold for PTSD: 2.3                                       | 10.6 [0.6; 18.3]                                                      |
| HTQ score threshold for PTSD: 2.7                                       | 7.2 [-3.1; 16.7]                                                      |
| Missing in “SES” in Lebanon are forced to “Don’t know/refuse to answer” | 9.5 [-0.1; 19.6]                                                      |
| Missing in “Violence” in Denmark are forced to “Yes”                    | 4.2 [-5.4; 14.8]                                                      |

272 Abbreviations: CI, confidence interval; HTQ, Harvard Trauma Questionnaire; PS,  
 273 propensity score; SES, socio-economic status. <sup>a</sup>All numbers are percentage point. The  
 274 95-percentile confidence interval is used for all estimates; <sup>b</sup>Based on 999 bootstrap  
 275 replications, otherwise based on 250 bootstrap replications. <sup>c</sup>Multiply imputed and PS-  
 276 weighted. Also see Figure 2.

277 **Figures**

278 **Figure 1: Missing fraction plot.**

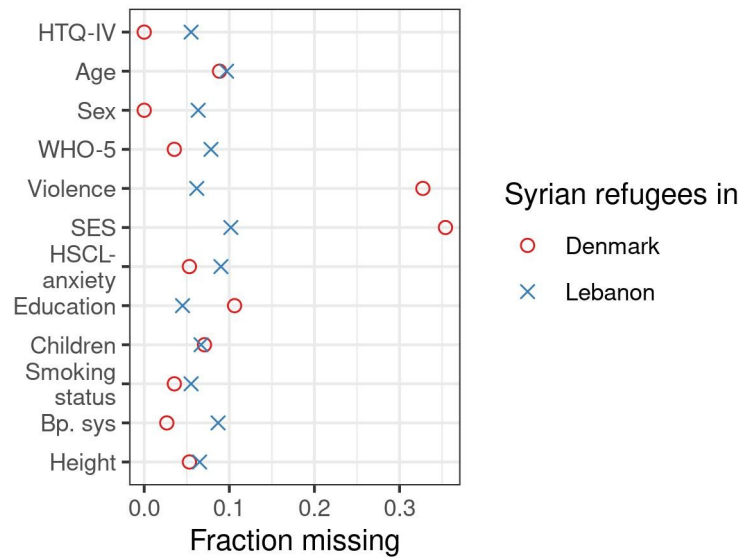

279 Variables included in the propensity score and multiple imputation models for  
280 estimating the association between long-distance migration and PTSD among Syrian  
281 refugees in Lebanon and Denmark. Abbreviations: HTQ-IV, Harvard Trauma  
282 Questionnaire part IV; WHO-5, WHO-5 Mental-health scale; Violence, exposure  
283 (directly or indirectly) to violence; HSCl-anxiety, Hopkins Symptom Check List,  
284 anxiety part; Bp.sys, systolic blood pressure.



285 **Figure 2: Estimate with different bootstrap confidence interval types.**

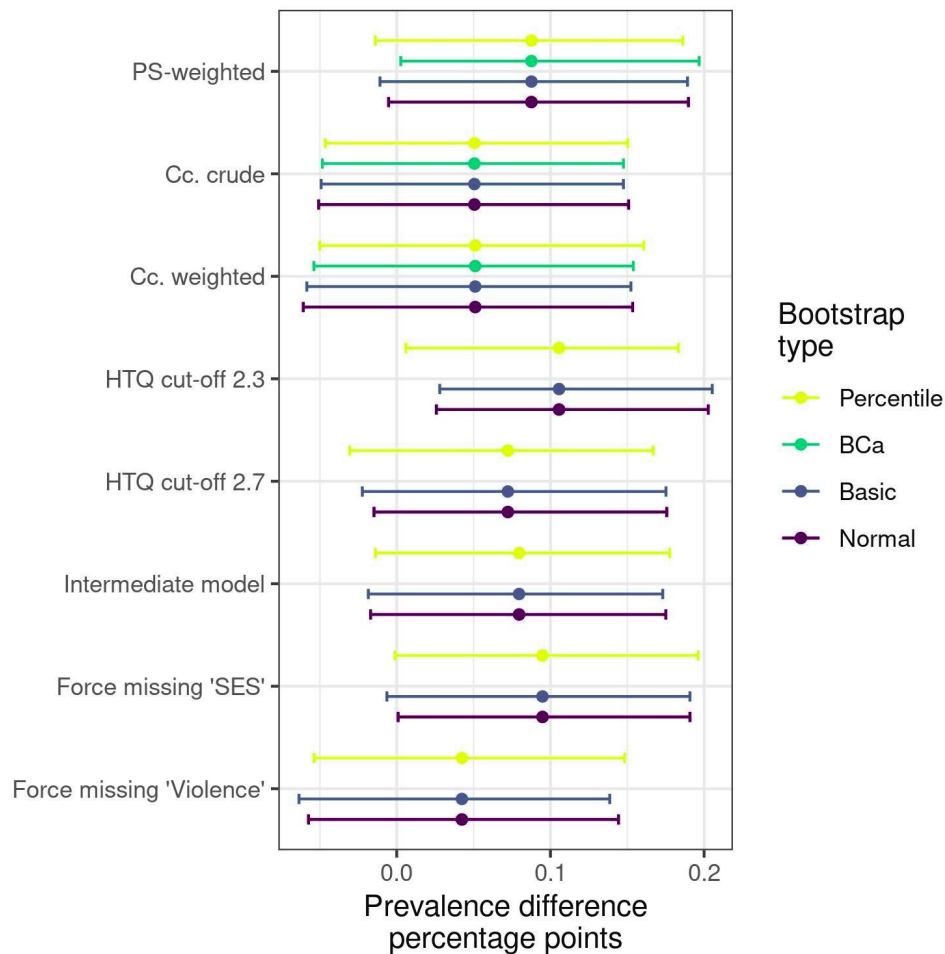

286 Abbreviations: BCa, bias-corrected and accelerated bootstrap CI; CI, confidence  
 287 interval; PS, propensity score; Cc, complete case; HTQ, Harvard Trauma Questionnaire  
 288 part IV; SES, socioeconomic status; Violence, exposure (directly or indirectly) to  
 289 violence. From the top: the propensity score-weighted (“substantive model”) and the  
 290 two complete case (no imputation) estimates with 999 bootstrap replications. The five  
 291 sensitivity analysis are at the bottom, each with 250 bootstrap replications (and thus no  
 292 BCa 95% CI).

## 293 **Author contributions**

294 Conceptualization: AHE; Methodology: AHE, MF; Formal analysis and investigation:  
295 AHE, MF; Writing - original draft preparation: AHE; Writing - review and editing:  
296 AHE, MPA, MF, AGG, MS, WJN, RSH; Funding acquisition: AHE; Resources: AHE,  
297 MPA, WJN, RSH, AGG, MS; Supervision: MF, RSH, MS, AGG, WJN.

## 298 **Acknowledgements**

299 The authors would like to thank the following for their invaluable help in the data  
300 collection, in no particular order: Dr. Fayez Saadaldin, Margrethe Nielsen, Susanne  
301 Løgsted, Rebekka Pedersen, Sine Søe Romedahl, Hanne Jeppesen, Dr. Chahid Farah,  
302 Dr. Fadi Nader, Dr. Malak Rammal, Dr. Mayssaloun Khairallah, Dr. Sultana Baydoun,  
303 Dr. Tanios Dagher, Dr. Maibritt Provstgaard, Maja Nielsen, Dr. Arendse Lykke Loua,  
304 Dr. Cecilie Blenstrup Patsche, Dr. Bjørg Olsen, Dr. Camilla Kjersgaard, Hawa-Idil  
305 Harakow.

## 306 **Data sharing**

307 The individual-level data cannot be shared because it contains sensitive information and  
308 its distribution would violate the agreement under which the data was provided as well  
309 as Danish law. The computing code for all parts of the data cleaning, analysis, and  
310 plotting is publicly available from the first author's Github repository:  
311 <https://github.com/eiset/ARCH>. This repository also contains all the exploratory plots  
312 produced.

## 313 **Ethics and research committee approval**

314 All relevant permissions and approvals were obtained prior to inclusion of any  
315 participant in Lebanon and Denmark including from the Lebanese Ministry of Public  
316 Health (2018/4/38918), the Ethics Committee of Mount Lebanon Hospital (PSY-2018-  
317 005), the Ethics Committee of the Lebanese University (CUMEB/D 144/232018) and  
318 the Danish Data Protection Agency (J.nr. 2015-41-4500). The Danish National  
319 Committee on Health Research Ethics waived the right to assess the project (F  
320 257/2015).

## 321 **Declaration of interests**

322 All authors declare no competing interests.

## 323 **Funding**

324 This research was supported by the Danish Institute in Damascus and The Graduate  
325 School of Health, Aarhus University, Denmark. The funding agencies had no role in the  
326 study design, data collection, data analysis, data interpretation, or writing of the report.

## 327 **References**

1. Blackmore R, Boyle JA, Fazel M, Ranasinha S, Gray KM, Fitzgerald G, et al. The prevalence of mental illness in refugees and asylum seekers: A systematic review and meta-analysis. *PLOS Med. Public Library of Science*; 2020;17:e1003337.
2. Gushulak BD, MacPherson DW. The basic principles of migration health: population mobility and gaps in disease prevalence. *Emerg Themes Epidemiol.* 2006;3:3–3.
3. Kristiansen M, Mygind A, Krasnik A. Health effects of migration. *Dan Med Bull.* 2007;54:46–7.
4. Spallek J, Zeeb H, Razum O. What do we have to know from migrants' past exposures to understand their health status? a life course approach. *Emerg Themes Epidemiol.* 2011;8:6.

5. Katrinli S, Stevens J, Wani AH, Lori A, Kilaru V, van Rooij SJH, et al. Evaluating the impact of trauma and PTSD on epigenetic prediction of lifespan and neural integrity. *Neuropsychopharmacology*. Nature Publishing Group; 2020;45:1609–16.
6. Scherrer JF, Salas J, Schnurr PP. Repeated Assessment of Posttraumatic Stress Disorder Severity and the Risk of Mortality. *JAMA Netw Open*. 2020;3:e1920493.
7. Shalev A, Liberzon I, Marmar C. Post-Traumatic Stress Disorder. *N Engl J Med*. 2017;376:2459–69.
8. Wisco BE, Marx BP, Miller MW, Wolf EJ, Krystal JH, Southwick SM, et al. A comparison of ICD-11 and DSM criteria for posttraumatic stress disorder in two national samples of U.S. military veterans. *J Affect Disord*. 2017;223:17–9.
9. Sareen J, Murray S, Michael F. Posttraumatic stress disorder in adults: Epidemiology, pathophysiology, clinical manifestations, course, assessment, and diagnosis [Internet]. UpToDate. [cited 2020 Oct 9]. Available from: <https://www.uptodate.com>
10. Keane TM, Marshall AD, Taft CT. Posttraumatic stress disorder: etiology, epidemiology, and treatment outcome. *Annu Rev Clin Psychol*. 2006;2:161–97.
11. Spolaore E, Wacziarg R. Ancestry, Language and Culture. *Palgrave Handb Econ Lang*. Palgrave Macmillan UK; 2016.
12. Wilding S, Martin D, Moon G. How far is a long distance? An assessment of the issue of scale in the relationship between limiting long-term illness and long-distance migration in England and Wales. *Popul Space Place*. 2018;24:e2090.
13. Detollenaere J, Baert S, Willems S. Association between cultural distance and migrant self-rated health. *Eur J Health Econ*. 2018;19:257–66.
14. Klein EM, Müller KW, Wölfling K, Dreier M, Ernst M, Beutel ME. The relationship between acculturation and mental health of 1st generation immigrant youth in a representative school survey: does gender matter? *Child Adolesc Psychiatry Ment Health* [Internet]. 2020 [cited 2021 Apr 30];14. Available from: <https://www.ncbi.nlm.nih.gov/pmc/articles/PMC7368737/>
15. Lara M, Gamboa C, Kahramanian MI, Morales LS, Hayes Bautista DE. Acculturation and Latino Health in the United States: A Review of the Literature and its Sociopolitical Context. *Annu Rev Public Health*. 2005;26:367–97.
16. Eiset AH, Aoun MP, Haddad RS, Naja WJ, Fuursted K, Nielsen HV, et al. Asylum seekers' and Refugees' Changing Health (ARCH) study protocol: an observational study in Lebanon and Denmark to assess health implications of long-distance migration on communicable and non-communicable diseases and mental health. *BMJ Open*. British Medical Journal Publishing Group; 2020;10:e034412.
17. United Nations Children's Fund (UNICEF), United Nations High Commissioner for Refugees (UNHCR) and the United Nations World Food Programme (WFP). Vulnerability Assessment for Syrian Refugees in Lebanon (VASyR-2018) [Internet]. 2018 Dec. Available from: <https://www.unhcr.org/lb/wp-content/uploads/sites/16/2018/01/VASyR-2017.pdf>
18. Sedgwick P. Stratified cluster sampling. *BMJ*. 2013;347:f7016.
19. Sharon L. Lohr. Sampling: Design and Analysis [Internet]. 2. Brooks/Cole, Cengage Learning; 2010 [cited 2019 Feb 27]. Available from: <https://www.sharonlohr.com/sampling-design-and-analysis>

20. Eiset AH, Frydenberg M. Considerations for using multiple imputation in propensity score-weighted analysis. medRxiv. Cold Spring Harbor Laboratory Press; 2021;2021.06.30.21259793.
21. Sato T, Matsuyama Y. Marginal structural models as a tool for standardization. *Epidemiol Camb Mass*. 2003;14:680–6.
22. R Core Team. R: A Language and Environment for Statistical Computing [Internet]. Vienna, Austria: R Foundation for Statistical Computing; 2020. Available from: <http://www.R-project.org/>
23. Strømme EM, Haj-Younes J, Hasha W, Fadnes LT, Kumar B, Igland J, et al. Health status and use of medication and their association with migration related exposures among Syrian refugees in Lebanon and Norway: a cross-sectional study. *BMC Public Health*. 2020;20:341.
24. Salant T, Lauderdale DS. Measuring culture: a critical review of acculturation and health in Asian immigrant populations. *Soc Sci Med*. 2003;57:71–90.
25. Hendrickx M, Woodward A, Fuhr DC, Sondorp E, Roberts B. The burden of mental disorders and access to mental health and psychosocial support services in Syria and among Syrian refugees in neighboring countries: a systematic review. *J Public Health. Oxford Academic*; 2020;42:e299–310.
26. Selmo P, Knaevelsrud C, Mohamad N, Rehm J. Prevalence and predictors of psychopathology in the war-afflicted Syrian population. *Transcult Psychiatry* [Internet]. SAGE PublicationsSage UK: London, England; 2020 [cited 2020 Nov 16]; Available from: [https://journals.sagepub.com/doi/10.1177/1363461520937931?url\\_ver=Z39.88-2003&rfr\\_id=ori%3Arid%3Acrossref.org&rfr\\_dat=cr\\_pub++0pubmed](https://journals.sagepub.com/doi/10.1177/1363461520937931?url_ver=Z39.88-2003&rfr_id=ori%3Arid%3Acrossref.org&rfr_dat=cr_pub++0pubmed)
27. Tinghög P, Malm A, Arwidson C, Sigvardsdotter E, Lundin A, Saboonchi F. Prevalence of mental ill health, traumas and postmigration stress among refugees from Syria resettled in Sweden after 2011: a population-based survey. *BMJ Open* [Internet]. 2017 [cited 2018 Oct 24];7. Available from: <https://www.ncbi.nlm.nih.gov/pmc/articles/PMC5778338/>
28. Sigvardsdotter E, Malm A, Tinghög P, Vaez M, Saboonchi F. Refugee trauma measurement: a review of existing checklists. *Public Health Rev*. 2016;37:10.
29. Tay AK, Mohsin M, Rees S, Steel Z, Tam N, Soares Z, et al. The factor structures and correlates of PTSD in post-conflict Timor-Leste: an analysis of the Harvard Trauma Questionnaire. *BMC Psychiatry* [Internet]. 2017 [cited 2020 Oct 9];17. Available from: <https://www.ncbi.nlm.nih.gov/pmc/articles/PMC5441051/>
30. Ichikawa M, Nakahara S, Wakai S. Cross-cultural use of the predetermined scale cutoff points in refugee mental health research. *Soc Psychiatry Psychiatr Epidemiol*. 2006;41:248–50.
