## 1 **Title**

2 Long-distance migration was associated with increased prevalence of post-traumatic stress disorder in  
3 Syrian refugees

## 4 **Authors**

5 Andreas Halgreen Eiset<sup>1\*</sup>, ORCID: 0000-0002-5487-8359

6 Michaelangelo P. Aoun<sup>2</sup>,

7 Monica Stougaard<sup>1</sup>,

8 Annemarie Graa Gottlieb<sup>1</sup>,

9 Ramzi S. Haddad<sup>2</sup>,

10 Morten Frydenberg<sup>3</sup>,

11 Wadih J. Naja<sup>2,4</sup>,

12 <sup>1</sup>Department of Affective Disorders, Aarhus University Hospital–Psychiatry, Aarhus, Denmark

13 <sup>2</sup>Faculty of Medical Sciences, Lebanese University, Beirut, Lebanon

14 <sup>3</sup>Consultant biostatistician, Trige, Denmark

15 <sup>4</sup>King Hussein Cancer Center, Jordan

16 \*Corresponding author

17 Andreas Halgreen Eiset

18 E-mail: [aneise@rm.dk](mailto:aneise@rm.dk)

## 19 **Abstract**

20 Background: Refugees are forced migrants but there is a large variation in the distance that refugees cover  
21 and there is a paucity in the evidence of how this may affect refugees' health and health care needs. We  
22 investigated the association between long-distance migration and post-traumatic stress disorder (PTSD), a  
23 serious psychiatric disorder associated with deteriorating mental and somatic health. Methods: Included  
24 from 2016-2019 were 712 adult Syrian refugees and asylum seekers in Lebanon and Denmark arrived up  
25 to 12 months prior. PTSD was assessed using the Harvard Trauma Questionnaire and the estimate of  
26 association was obtained by multiply imputing missing data and adjusting for confounding by propensity  
27 score-weighting with covariates age, sex, socioeconomic status, trauma experience and WHO-5-score,  
28 reporting the bootstrap 95-percentile confidence interval (95% CI). Additionally, a number of sensitivity  
29 analyses were performed. Results: After multiply imputing missing data and propensity score-weighted  
30 adjustment for confounding, migration to Denmark instead of Lebanon was associated with an increase in  
31 PTSD prevalence of 9 percentage point (95% CI [-1; 19] percentage point). Discussion: We found that  
32 long-distance migration was associated with an increase in the prevalence of PTSD suggesting that long-  
33 distance migration may be a factor to consider when assessing refugees' and asylum seekers' health.  
34 Practitioners should consider "long-distance migration" in refugee health screenings and in particular  
35 when assessing the risk of post-traumatic stress disorder. Future research should be designed to ultimately  
36 lead to studies of relevant interventions to lower the risk of post-traumatic stress disorder in refugees.

## 37 **Keywords**

38 Refugees; Human migration; Emigration and Immigration; Post-traumatic stress disorder; Propensity  
39 score; Cross-sectional studies

## 40 **Introduction**

41 Refugees suffer from high risk of post-traumatic stress disorder (PTSD) [1] and are exposed to many risk-  
42 factors for PTSD before, during and after migration [2–4]. Risk factors for PTSD in the country of origin  
43 and in the host country has been examined in detail; however, the contribution of the migration itself has  
44 not received much attention in refugee health research. PTSD is a disorder that may develop after a

45 traumatic event and is associated with significant loss of functioning and increased morbidity and  
46 mortality [5,6]. Symptoms of PTSD include intrusion (e.g. “flash-backs” and nightmares), avoidance and  
47 arousal, characterized by persistent perception of threat which may result in sleep deprivation, irritability  
48 and inability to concentrate [7,8]. Risk factors for developing PTSD comprise multiple trauma, female  
49 sex, being spouseless, ethnicity, lower educational status, comorbid mental disorders and type of trauma  
50 (for example intentional trauma, sexual assault etc.) [7]. Additionally, gene-environment interactions may  
51 play a key role [9]. Dysfunction of the amygdala (emotional learning and memory modulation) and  
52 medial prefrontal cortex (executive function) are key elements in PTSD and the disease is associated with  
53 epigenetic changes, increased blood levels of norepinephrine and decreased blood levels of  
54 glucocorticoids [7]. The life-time prevalence of PTSD in the general population is estimated to be around  
55 5% for males and 10% for females with considerable variation according to the study population and  
56 diagnostic tools utilized [7,10]. In comparison, a recent meta-analysis produced a summary prevalence  
57 estimate for PTSD of 31% across all refugees [1] with little difference between males (29%) and females  
58 (34%) though with considerable variation between the country of origin, host countries and diagnostic  
59 tools; however, not taking migration history into account. The impact of migration and the role and  
60 measurement of “distance” (geographical, cultural, linguistic etc.) has been discussed at length for a  
61 number of outcomes [11,12] and long-distance migration has been associated with poorer self-rated health  
62 in the general population [13], hypothesizing a link with increasing difficulty in acculturation [14,15]. In  
63 the present study, we aimed at taking an initial step in assessing the effect of migration on refugees’ and  
64 asylum seekers’ health by comparing the prevalence of PTSD in newly arrived Syrian refugees and  
65 asylum seekers in Lebanon and Denmark.

## 66 **Methods**

67 In a cross-sectional design with one-stage cluster randomized sampling between 2016 and 2019, newly  
68 arrived adult Syrian refugees were included in Lebanon and newly arrived Syrian asylum seekers were  
69 included in Denmark and assessed for PTSD using the Harvard Trauma Questionnaire (HTQ)-scale with  
70 cut-off score at 2.5. The implemented inclusion criteria were: (a) adult ( $\geq 18$  years of age), (b) Syrian-  
71 born, (c) had left Syria after the onset of the ongoing civil-war (after February 2011), (d) arrived in

72 Lebanon or Denmark less than 12 months prior to inclusion and (e) resident in the Lebanese settlements  
73 or Danish asylum seeker centres at the time of inclusion. Exclusion criteria were physical or mental  
74 illness that prevented participation. Variables to be collected to address confounding were decided upon *a*  
75 *priori* after discussions among the authors guided by graphical representations of our assumptions. See  
76 the Supplement 1-9 for a detailed description of the data collection instruments and the directed acyclic  
77 graph illustrating our assumptions about the relation of the variables. Also the study protocol is published  
78 and freely available [16].

79 Lebanon is a country of about 6 million people living in an area of nearly 10.000 km<sup>2</sup>—comparable in  
80 size to the two major Danish island (Zealand and Funen). Since 2015 Lebanon has stopped accepting  
81 asylum applications from Syrians seeking refuge in Lebanon. Nevertheless, being a close neighbour, in  
82 both geographical, linguistic and cultural distance, the influx of refugees from the Syrian war has  
83 endured. The majority live in structures ranging from regular (though dilapidated) structures to  
84 improvised tents clustered in informal gatherings scattered across Lebanon [17]. We stratified Lebanon  
85 into five regions based on geography, infrastructure and insights about local concerns (political, religious  
86 etc.). In each region, we collaborated with the local health service operators to draw up the sampling  
87 frame of gatherings and randomly decided on the inclusion sites, where all individuals eligible for  
88 inclusion were invited to participate (i.e. stratified cluster sampling [18,19]). See the Supplement 2 for  
89 details on the sampling frame. We obtained permission to include participants in all regions of Lebanon,  
90 that is, we had access to include participants from areas that are usually outside the reach of researchers  
91 due to “security considerations”. Should a chosen site be deemed unsafe at the scheduled time of  
92 inclusion we relocated to the closest setting deemed appropriate within the same region.

93 Denmark is a country of about 6 million people living in an area of about 50.000 km<sup>2</sup>. In Denmark, all  
94 eligible residents at a random sample of asylum centres were invited. The Danish asylum seeker centres  
95 are run by the Danish Immigration Services but outsourced to different operators. Several types of asylum  
96 seeker centres exist with the most common being the accommodation centre, to which the asylum seeker  
97 is allocated by random shortly after arrival and applying for asylum in Denmark. Of five available  
98 operators, three responded to the invitation, all accepting to participate in the study, representing a total of

99 11 accommodation asylum centres. Data-collection teams of two to four healthcare professionals were  
100 instructed during several pre-collection sessions in the practicalities and ethical considerations involved in  
101 the task: this encompassed obtaining written and informed consent, appropriate handling of confidential  
102 information, collection of the questionnaire data, the mental health self-rating scales, clinical  
103 measurements and the biological samples. At consent, the participant was instructed to independently  
104 complete a background questionnaire and mental health scales. The data collectors assisted those who  
105 could not read or write or had further questions regarding the study. Afterwards, the participant was  
106 invited to a semi-structured clinical interview and a short clinical exam of basic parameters (blood  
107 pressure, height, weight). Participants could at any time opt out of the data collection; if choosing to do  
108 so the participant was asked if she would care to provide a reason. Also, individuals who were invited but  
109 refused to participate were asked for a short non-structured interview including basic demographics and  
110 reason for refusal. The procedure was piloted in its entirety in Denmark including 10 participants in an  
111 asylum seeker centre, resulting in minor adjustments to the workflow. All relevant permissions were  
112 obtained prior to inclusion of any participant in both Lebanon and Denmark.

113 In the following we give a brief summary of the applied statistical methodology. Further details are given  
114 in the Supplement 3-9 and a thorough discussion of the statistical methodological considerations  
115 necessary to combine multiple imputation and propensity score-weighted analysis is provided in Eiset and  
116 Frydenberg [20]. Missing data was multiply imputed and confounding was address by propensity score-  
117 weighting including age, sex, socioeconomic status, experienced trauma and WHO-5-score in the model.  
118 The “standardised mortality ratio”-weights [21] was computed to estimate the weighted prevalence  
119 difference of PTSD in the population that fled to Denmark instead of Lebanon and presented with a 95-  
120 percentile confidence interval found by bootstrapping. A number of sensitivity analyses were carried out  
121 to assess the robustness of the estimated association between long-distance migration and PTSD. All data  
122 management, analysis and plots were done in R [22]. Further details are given in the Supplement 5 as  
123 well as directly in the R code available together with the *a priori* described analysis plan and a number of  
124 the exploratory plots from <https://github.com/eiset/ARCH>.

## 125 **Results**

126 A total of 599 individuals were included in Lebanon and 113 were included in Denmark. Table 1 gives a  
127 statistical summary of the inclusion process and non-participation. The study populations differed on key  
128 variables such as sex (female: 73% in Lebanon, 47% in Denmark) and experience of violence (24% in  
129 Lebanon, 39% in Denmark) and there were missing values for all variables except long-distance  
130 migration. Figure 1 illustrates the missing proportion of key variables stratified on exposure status and  
131 Table 2 gives a detailed summary of the study population characteristics for both the observed realization  
132 and the imputed data set including missing for each covariates in the observed data.

133 The unadjusted prevalence of PTSD was higher in Denmark (60.2%) compared with Lebanon (55.1%).  
134 The prevalence difference of PTSD increased from 5.1 percentage point (95-percentile CI [-4.6; 15.0]) to  
135 8.8 percentage point (95-percentile CI [-1.4; 18.6 percentage point]) after multiply imputing missing data  
136 and adjusting for confounding by propensity score-weighting. All sensitivity analyses produced estimates  
137 in the same direction and of the same magnitude, except when forcing all missing in the “Violence”  
138 variable to “Yes” in the study population included in Denmark, thus, grossly violating the missing-at-  
139 random assumption of multiple imputation. Table 3 presents the point estimate for the propensity score-  
140 weighted analysis and each of the sensitivity analysis accompanied by Figure 2 which includes different  
141 types of bootstrap confidence intervals.

## 142 **Discussion**

143 This study aimed at estimating the association between long-distance migration and prevalence of PTSD.  
144 The estimate of association corresponded to 87 additional cases of PTSD for every 1000 Syrian refugees  
145 that migrated to Denmark instead of Lebanon. The 95% confidence interval indicate that, under the  
146 model, the estimate may be as high as 190 additional cases or as low as 4 cases less per 1000 refugees,  
147 thus, the estimate did not reach statistical significance, which may be ascribed to the relatively low  
148 number of participants. The targeted sample size was not reached neither in Lebanon nor in Denmark due  
149 to structural and political obstacles during the data collection.

150 To the best of the authors' knowledge this is the first investigation of the association of long-distance  
151 migration and PTSD in a refugee population. A recent study [23] of Syrian refugees in Lebanon and  
152 Norway found a prevalence of PTSD (assessed as HTQ-score  $\geq 2.5$ ) of 4% in Lebanon and 7% in  
153 Norway. The study conflated heterogeneous groups for example asylum-seekers and refugees and  
154 participants with short and long stay in the host country prior to inclusion in the study. The study found  
155 that "Host country, Norway" was associated with an average increase in HTQ-score of 3% (95% CI [-5%;  
156 12%]) when adjusting for age and sex; however, did not provide estimates of how this translated into  
157 absolute number of participants with PTSD. With a mean HTQ-score of 1.49 in the study population in  
158 Lebanon the number of additional cases in Norway due to "host country" would be marginal. The  
159 underlying cause for the observed increase in PTSD prevalence in Syrian refugees and asylum seekers  
160 after long-distance migration has never been investigated. In our study, we approach this by minimized  
161 the effect of living in the host country, thus, "long-distance migration" represented the migration process  
162 itself (travelling through Europe). We found a high prevalence of PTSD and an increased prevalence  
163 difference compared with the aforementioned study. Some studies hypothesise that great distance between  
164 populations is associated with difficulty acculturating which in turn is associated with worse health  
165 outcomes, including mental health [13,15,24]. The presented study is a first step in examining this in a  
166 refugee population.

167 The prevalence estimates of PTSD was high in both Lebanon and Denmark compared with previous  
168 studies of Syrian refugees and across different study designs and utilized instruments for assessing PTSD  
169 [1,25–27]. In the present study, we utilized the widely used HTQ-score [28] which is considered valid  
170 across multiple settings and diagnostic classification systems [29] although the specific cut-off has been  
171 debated [30]. The sensitivity analysis showed little change in the estimate of association including when  
172 changing the HTQ-score cut-off. An effort was made to make the data collection in Lebanon and  
173 Denmark as comparable as possible; however, differences may exist introducing information bias. For  
174 example, differential misclassification cannot be ruled out, if, during data collection in Denmark, doubt  
175 remained among the participants whether specific answers would affect their asylum application. This  
176 may explain (some of) the difference in prevalence of PTSD in Lebanon and Denmark; however, judged  
177 from extensive exploratory plotting of the covariates, there was no difference between the exposure

178 groups in the association of the reported HTQ-score and WHO-5 (general mental well-being) or  
179 depression- or anxiety-scores, thus, the participants would have had to be very consistent in their  
180 misclassification of own mental health. The proportion that refused to answer, or did not know what to  
181 answer, in the question on socioeconomic status was high and differed between the study population in  
182 Denmark (22%) and in Lebanon (7%). After discussing this variable with Syrian natives, we speculate  
183 that “socioeconomic status” was not defined in sufficient detail for all participants to be able to reflect on  
184 the question; however, we do not have an explanation for the difference in proportion of missing between  
185 Lebanon and Denmark. We consider the risk of selection bias low given the randomized sampling design  
186 and very high participation rates. It was, however, not possible to retrieve or create a precise sampling  
187 frame in Lebanon and thus, it was based on best information available at the time, knowing that refugees  
188 frequently relocate and there is little registration of individuals outside the formalized refugee camps.

189 In the present study, the interpretation of the association between long-distance migration and PTSD is of  
190 course limited by the cross-sectional study design. Most importantly, the time-order may be reversed so  
191 that instead of long-distance migration leading to higher risk of PTSD it may be that PTSD affect the  
192 “risk” of undertaking long-distance migration. A positive association between long-distance migration  
193 and PTSD was found, thus, a reversal of the time order would mean that individuals with PTSD are more  
194 likely to undertake long-distance migration. Although this cannot be entirely rejected, taking into account  
195 the classical symptoms of PTSD such as difficulties in concentrating and planning, this interpretation of  
196 the result seems far less likely than our stated hypothesis: that undertaking an, at times, hazardous travel  
197 and living with uncertainty about the near future, increases the risk of PTSD.

198 We addressed confounding by propensity score-weighting and obtained balance on all covariates judged  
199 from our pre-specified criteria. To account for confounding we included covariates in the propensity score  
200 model according to what the authors believe is the current best evidence [7]; however, this does not  
201 alleviate us of speculations of entirely other covariates that may change the estimate. Furthermore, the  
202 collapsing of two levels of the socioeconomic status covariate diminishes the information this variable  
203 contains and thus may be a source for residual confounding in both the multiple imputation and in the  
204 propensity score weighted analysis. The missing mechanism was “everywhere missing-at-random”



205 allowing for frequentist inference from the multiply imputed data. In the Supplement 4 we provide  
206 examples of the discussion necessary for each partly observed variable to deem the missingness  
207 mechanism “everywhere missing-at-random”.

208 Future research should be designed to determine if the association is transportable to other groups of  
209 refugees and to investigate the underlying factors contributing to the association, for example examine the  
210 different measures of “distance” (cultural, geographical etc.), the different types of trauma refugees may  
211 experience during migration (poor shelters, starvation, interpersonal violence etc.), means of  
212 transportation during the migration and the (health) reception in the host country. We note that the  
213 direction of the association was consistent across different thresholds for PTSD (effectively lowering and  
214 raising the estimated prevalence for PTSD in the study population), different propensity score models and  
215 when imposing violation of underlying assumptions of multiple imputation; the strength was also  
216 relatively consistent. We hypothesize that the association will be reproducible at least in comparable  
217 populations and settings—for example newly arrived adult refugees from a Middle Eastern country to a  
218 Western European country. Also, the association between long-distance migration and other health  
219 outcomes, for example other mental health issues, is of great interest. The presented study is an initial  
220 analysis of the association between long-distance migration and PTSD and provides the foundation upon  
221 which future studies could build.

## 222 Tables

223 **Table 1: Summary of the inclusion in Denmark and Lebanon**

|                               | <b>Denmark</b><br>n(%)          | <b>Lebanon</b><br>n(%)        |
|-------------------------------|---------------------------------|-------------------------------|
| Source population             | 613 <sup>a</sup>                | 1,011,366 <sup>a</sup>        |
| Examined for eligibility      | 124                             | 641                           |
| Excluded                      | 3                               | 11                            |
| Invited                       | 121 (100%)                      | 630 (100%)                    |
| Refused to participate        |                                 |                               |
| Total                         | 8 (7%)                          | 31 (5%)                       |
| Sex, female                   | 2                               | 5 <sup>b</sup>                |
| Age <sup>c</sup>              | All between 20 and 30 years old | All younger than 50 years old |
| Reasons <sup>d</sup>          |                                 |                               |
| Mistrust                      | 5                               | 1                             |
| No time                       | 2                               | 4                             |
| No personal gain              | 0                               | 2                             |
| No answer                     | 1                               | 24                            |
| Included (participation rate) | 113 (93%)                       | 599 (95%)                     |

224 <sup>a</sup>The number given for the source population represents a maximum and include for example children. It  
 225 was not possible to obtain a more precise estimate of the study population. <sup>b</sup>Sex was only recorded for 8  
 226 non-participants in Lebanon. <sup>c</sup>Few non-participants provided age (two in Denmark and two in Lebanon),  
 227 thus a best guess is provided. <sup>d</sup>Reasons provided from the non-participants, aggregated into smallest  
 228 possible number of strata.

229 **Table 2: Comparison of summary statistics of key variables in observed (with missing) and imputed**  
230 **data set stratified on exposure group**

|                                          | Observed data      |                    | Imputed data       |                    |
|------------------------------------------|--------------------|--------------------|--------------------|--------------------|
|                                          | Lebanon<br>(n=599) | Denmark<br>(n=113) | Lebanon<br>(n=599) | Denmark<br>(n=113) |
| Age - years old                          | 35 (20)            | 30 (12.5)          | 35 (20)            | 30 (12.9)          |
| Missing                                  | n=58 (9.7%)        | n=10 (8.9%)        | NA                 | NA                 |
| Sex                                      |                    |                    |                    |                    |
| Female                                   | 72.7%              | 46.9%              | 72.7%              | 46.9%              |
| Missing                                  | n=38 (6.3%)        | n=0                | NA                 | NA                 |
| WHO-5-score                              | 24 (32)            | 24 (48)            | 24 (32)            | 24 (48)            |
| Missing                                  | n=47 (7.9%)        | n=4 (3.5%)         | NA                 | NA                 |
| Experienced violence                     |                    |                    |                    |                    |
| Yes                                      | 23.8%              | 39.5%              | 23.8%              | 39.7%              |
| Missing                                  | n=37 (6.2%)        | n=37 (32.7%)       | NA                 | NA                 |
| Socioeconomic status                     |                    |                    |                    |                    |
| Below average                            | 25.5%              | 24.7%              | 25.3%              | 23.2%              |
| On average                               | 63.4%              | 50.7%              | 63.4%              | 50.0%              |
| Above average <sup>a</sup>               | 4.5%               | 2.7%               | 11.3% <sup>a</sup> | 26.8% <sup>a</sup> |
| Don't know/refuse to answer <sup>a</sup> | 6.7%               | 21.9%              |                    |                    |
| Missing                                  | n=61 (10.2%)       | n=40 (35.4%)       |                    |                    |
| HTQ score                                | 2.56 (0.94)        | 2.62 (1)           | 2.56 (0.95)        | 2.62 (1)           |
| Missing                                  | n=33 (5.5%)        | n=0                | NA                 | NA                 |
| PTSD (HTQ score $\geq$ 2.5)              |                    |                    |                    |                    |
| Overall                                  | 55.1%              | 60.2%              | 54.9%              | 60.2%              |
| Female                                   | 59.4%              | 66.0%              | 59.1%              | 66.0%              |
| Male                                     | 44.7%              | 55.0%              | 43.7%              | 55.0%              |
| Missing                                  | n=33 (5.5%)        | n=0                | NA                 | NA                 |

231 Categorical variables are represented as % of observations. Continuous variables are represented as

232 median (interquartile range). Missing is given as n (%) of all included participants for the observed data

233 set. <sup>a</sup>In the substantive model, and thus in the multiple imputation, the strata “Above average” and “Don’t  
 234 know/refuse to answer” was collapsed due to numerical problems in the multiple imputation.

235 **Table 3: Estimated prevalence difference in crude, propensity score analysis and sensitivity analysis**

|                                                                         | <b>Prevalence difference;<br/>point estimate [95% CI]<sup>a</sup></b> |
|-------------------------------------------------------------------------|-----------------------------------------------------------------------|
| Multiply imputed and PS-weighted analysis                               | 8.8 [-1.4; 18.6] <sup>b</sup>                                         |
| Complete case analyses                                                  |                                                                       |
| Crude                                                                   | 5.1 [-4.6; 15.0] <sup>b</sup>                                         |
| PS-weighted                                                             | 5.1 [-5.0; 16.1] <sup>b</sup>                                         |
| Sensitivity analysis <sup>c</sup>                                       |                                                                       |
| Alternative PS model                                                    | 8.0 [-1.4; 17.8]                                                      |
| HTQ score threshold for PTSD: 2.3                                       | 10.6 [0.6; 18.3]                                                      |
| HTQ score threshold for PTSD: 2.7                                       | 7.2 [-3.1; 16.7]                                                      |
| Missing in “SES” in Lebanon are forced to “Don’t know/refuse to answer” | 9.5 [-0.1; 19.6]                                                      |
| Missing in “Violence” in Denmark are forced to “Yes”                    | 4.2 [-5.4; 14.8]                                                      |

236 Abbreviations: CI, confidence interval; HTQ, Harvard Trauma Questionnaire; PS, propensity score; SES,  
 237 socio-economic status. <sup>a</sup>All numbers are percentage point. The 95-percentile confidence interval is used  
 238 for all estimates; <sup>b</sup>Based on 999 bootstrap replications, otherwise based on 250 bootstrap replications.  
 239 <sup>c</sup>Multiply imputed and PS-weighted. Also see Figure 2.

## 240 **Figures**

### 241 **Figure 1: Missing fraction plot.**

242 Variables included in the propensity score and multiple imputation models for estimating the association  
 243 between long-distance migration and PTSD among Syrian refugees in Lebanon and Denmark.

244 Abbreviations: HTQ-IV, Harvard Trauma Questionnaire part IV; WHO-5, WHO-5 Mental-health scale;  
 245 Violence, exposure (directly or indirectly) to violence; HSCL-anxiety, Hopkins Symptom Check List,  
 246 anxiety part; Bp.sys, systolic blood pressure.

### 247 **Figure 2: Estimate with different bootstrap confidence interval types.**

248 Abbreviations: BCa, bias-corrected and accelerated bootstrap CI; CI, confidence interval; PS, propensity  
 249 score; Cc, complete case; HTQ, Harvard Trauma Questionnaire part IV; SES, socioeconomic status;

250 Violence, exposure (directly or indirectly) to violence. From the top: the propensity score-weighted  
251 (“substantive model”) and the two complete case (no imputation) estimates with 999 bootstrap  
252 replications. The five sensitivity analysis are at the bottom, each with 250 bootstrap replications (and thus  
253 no BCa 95% CI).

## 254 **Author contributions**

255 Conceptualization: AHE; Methodology: AHE, MF; Formal analysis and investigation: AHE, MF; Writing  
256 - original draft preparation: AHE; Writing - review and editing: AHE, MPA, MF, AGG, MS, WJN, RSH;  
257 Funding acquisition: AHE; Resources: AHE, MPA, WJN, RSH, AGG, MS; Supervision: MF, RSH, MS,  
258 AGG, WJN.

## 259 **Acknowledgements**

260 The authors would like to thank the following for their invaluable help in the data collection, in no  
261 particular order: Dr. Fayez Saadaldin, Margrethe Nielsen, Susanne Løgsted, Rebekka Pedersen, Sine Søre  
262 Romedahl, Hanne Jeppesen, Dr. Chahid Farah, Dr. Fadi Nader, Dr. Malak Rammal, Dr. Mayssaloun  
263 Khairallah, Dr. Sultana Baydoun, Dr. Tanios Dagher, Dr. Maibritt Provstgaard, Maja Nielsen, Dr. Arendse  
264 Lykke Loua, Dr. Cecilie Blenstrup Patsche, Dr. Bjørg Olsen, Dr. Camilla Kjersgaard, Hawa-Idil Harakow.

## 265 **Data and code sharing**

266 The individual-level data cannot be shared because it contains sensitive information and its distribution  
267 would violate the agreement under which the data was provided as well as Danish law. The computing  
268 code for all parts of the data cleaning, analysis, and plotting is publicly available from the first author’s  
269 Github repository: <https://github.com/eiset/ARCH>. This repository also contains all the exploratory plots  
270 produced.

## 271 **Ethics and research committee approval**

272 All relevant permissions and approvals were obtained prior to inclusion of any participant in Lebanon and  
273 Denmark including from the Lebanese Ministry of Public Health (2018/4/38918), the Ethics Committee

274 of Mount Lebanon Hospital (PSY-2018-005), the Ethics Committee of the Lebanese University  
275 (CUMEB/D 144/232018) and the Danish Data Protection Agency (J.nr. 2015-41-4500). The Danish  
276 National Committee on Health Research Ethics waived the right to assess the project (F 257/2015).

## 277 **Declaration of interests**

278 All authors declare no competing interests.

## 279 **Funding**

280 This research was supported by the Danish Institute in Damascus and The Graduate School of Health,  
281 Aarhus University, Denmark. The funding agencies had no role in the study design, data collection, data  
282 analysis, data interpretation, or writing of the report.

## 283 **References**

1. Blackmore R, Boyle JA, Fazel M, Ranasinha S, Gray KM, Fitzgerald G, et al. The prevalence of mental illness in refugees and asylum seekers: A systematic review and meta-analysis. *PLOS Med. Public Library of Science*; 2020;17:e1003337.
2. Gushulak BD, MacPherson DW. The basic principles of migration health: population mobility and gaps in disease prevalence. *Emerg Themes Epidemiol.* 2006;3:3–3.
3. Kristiansen M, Mygind A, Krasnik A. Health effects of migration. *Dan Med Bull.* 2007;54:46–7.
4. Spallek J, Zeeb H, Razum O. What do we have to know from migrants' past exposures to understand their health status? a life course approach. *Emerg Themes Epidemiol.* 2011;8:6.
5. Katrinli S, Stevens J, Wani AH, Lori A, Kilaru V, van Rooij SJH, et al. Evaluating the impact of trauma and PTSD on epigenetic prediction of lifespan and neural integrity. *Neuropsychopharmacology.* Nature Publishing Group; 2020;45:1609–16.
6. Scherrer JF, Salas J, Schnurr PP. Repeated Assessment of Posttraumatic Stress Disorder Severity and the Risk of Mortality. *JAMA Netw Open.* 2020;3:e1920493.
7. Shalev A, Liberzon I, Marmar C. Post-Traumatic Stress Disorder. *N Engl J Med.* 2017;376:2459–69.
8. Wisco BE, Marx BP, Miller MW, Wolf EJ, Krystal JH, Southwick SM, et al. A comparison of ICD-11 and DSM criteria for posttraumatic stress disorder in two national samples of U.S. military veterans. *J Affect Disord.* 2017;223:17–9.
9. Sareen J, Murray S, Michael F. Posttraumatic stress disorder in adults: Epidemiology, pathophysiology, clinical manifestations, course, assessment, and diagnosis [Internet]. UpToDate. [cited 2020 Oct 9]. Available from: <https://www.uptodate.com>

10. Keane TM, Marshall AD, Taft CT. Posttraumatic stress disorder: etiology, epidemiology, and treatment outcome. *Annu Rev Clin Psychol.* 2006;2:161–97.
11. Spolaore E, Wacziarg R. *Ancestry, Language and Culture*. Palgrave Handb Econ Lang. Palgrave Macmillan UK; 2016.
12. Wilding S, Martin D, Moon G. How far is a long distance? An assessment of the issue of scale in the relationship between limiting long-term illness and long-distance migration in England and Wales. *Popul Space Place.* 2018;24:e2090.
13. Detollenaere J, Baert S, Willems S. Association between cultural distance and migrant self-rated health. *Eur J Health Econ.* 2018;19:257–66.
14. Klein EM, Müller KW, Wölfling K, Dreier M, Ernst M, Beutel ME. The relationship between acculturation and mental health of 1st generation immigrant youth in a representative school survey: does gender matter? *Child Adolesc Psychiatry Ment Health [Internet].* 2020 [cited 2021 Apr 30];14. Available from: <https://www.ncbi.nlm.nih.gov/pmc/articles/PMC7368737/>
15. Lara M, Gamboa C, Kahramanian MI, Morales LS, Hayes Bautista DE. Acculturation and Latino Health in the United States: A Review of the Literature and its Sociopolitical Context. *Annu Rev Public Health.* 2005;26:367–97.
16. Eiset AH, Aoun MP, Haddad RS, Naja WJ, Fursted K, Nielsen HV, et al. Asylum seekers’ and Refugees’ Changing Health (ARCH) study protocol: an observational study in Lebanon and Denmark to assess health implications of long-distance migration on communicable and non-communicable diseases and mental health. *BMJ Open. British Medical Journal Publishing Group;* 2020;10:e034412.
17. United Nations Children’s Fund (UNICEF), United Nations High Commissioner for Refugees (UNHCR) and the United Nations World Food Programme (WFP). *Vulnerability Assessment for Syrian Refugees in Lebanon (VASyR-2018) [Internet].* 2018 Dec. Available from: <https://www.unhcr.org/lb/wp-content/uploads/sites/16/2018/01/VASyR-2017.pdf>
18. Sedgwick P. Stratified cluster sampling. *BMJ.* 2013;347:f7016.
19. Sharon L. Lohr. *Sampling: Design and Analysis [Internet].* 2. Brooks/Cole, Cengage Learning; 2010 [cited 2019 Feb 27]. Available from: <https://www.sharonlohr.com/sampling-design-and-analysis>
20. Eiset AH, Frydenberg M. Considerations for using multiple imputation in propensity score-weighted analysis. medRxiv. Cold Spring Harbor Laboratory Press; 2021;2021.06.30.21259793.
21. Sato T, Matsuyama Y. Marginal structural models as a tool for standardization. *Epidemiol Camb Mass.* 2003;14:680–6.
22. R Core Team. *R: A Language and Environment for Statistical Computing [Internet].* Vienna, Austria: R Foundation for Statistical Computing; 2020. Available from: <http://www.R-project.org/>
23. Strømme EM, Haj-Younes J, Hasha W, Fadnes LT, Kumar B, Iglund J, et al. Health status and use of medication and their association with migration related exposures among Syrian refugees in Lebanon and Norway: a cross-sectional study. *BMC Public Health.* 2020;20:341.
24. Salant T, Lauderdale DS. Measuring culture: a critical review of acculturation and health in Asian immigrant populations. *Soc Sci Med.* 2003;57:71–90.

25. Hendrickx M, Woodward A, Fuhr DC, Sondorp E, Roberts B. The burden of mental disorders and access to mental health and psychosocial support services in Syria and among Syrian refugees in neighboring countries: a systematic review. *J Public Health. Oxford Academic*; 2020;42:e299–310.
26. Selmo P, Knaevelsrud C, Mohamad N, Rehm J. Prevalence and predictors of psychopathology in the war-afflicted Syrian population. *Transcult Psychiatry [Internet]*. SAGE PublicationsSage UK: London, England; 2020 [cited 2020 Nov 16]; Available from: [https://journals.sagepub.com/doi/10.1177/1363461520937931?url\\_ver=Z39.88-2003&rft\\_id=ori%3Arid%3Acrossref.org&rft\\_dat=cr\\_pub++0pubmed](https://journals.sagepub.com/doi/10.1177/1363461520937931?url_ver=Z39.88-2003&rft_id=ori%3Arid%3Acrossref.org&rft_dat=cr_pub++0pubmed)
27. Tinghög P, Malm A, Arwidson C, Sigvardsdotter E, Lundin A, Saboonchi F. Prevalence of mental ill health, traumas and postmigration stress among refugees from Syria resettled in Sweden after 2011: a population-based survey. *BMJ Open [Internet]*. 2017 [cited 2018 Oct 24];7. Available from: <https://www.ncbi.nlm.nih.gov/pmc/articles/PMC5778338/>
28. Sigvardsdotter E, Malm A, Tinghög P, Vaez M, Saboonchi F. Refugee trauma measurement: a review of existing checklists. *Public Health Rev.* 2016;37:10.
29. Tay AK, Mohsin M, Rees S, Steel Z, Tam N, Soares Z, et al. The factor structures and correlates of PTSD in post-conflict Timor-Leste: an analysis of the Harvard Trauma Questionnaire. *BMC Psychiatry [Internet]*. 2017 [cited 2020 Oct 9];17. Available from: <https://www.ncbi.nlm.nih.gov/pmc/articles/PMC5441051/>
30. Ichikawa M, Nakahara S, Wakai S. Cross-cultural use of the predetermined scale cutoff points in refugee mental health research. *Soc Psychiatry Psychiatr Epidemiol.* 2006;41:248–50.



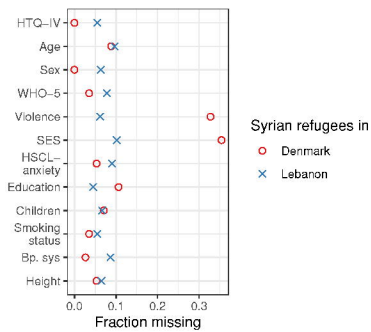

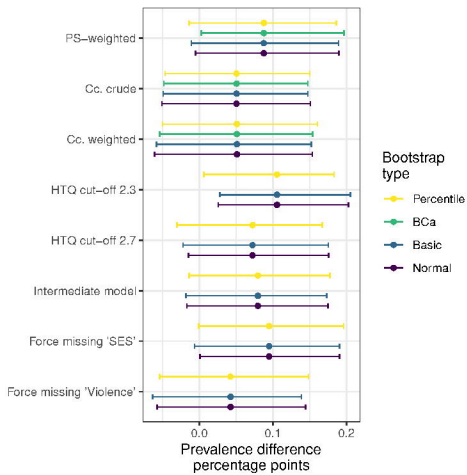

Source: https://www.medrxiv.org/content/10.1101/2021.07.09.21259930v2.full.pdf
